# Supplementary material for: Symmetry-breaking phase transitions, dielectric and magnetic properties of pyrrolidinium-tetrahalidocobaltates
Source: Royal Society of Chemistry journal article supplement (doi:10.1039/d2qi00187j), 2022-01-01
Supplement: d2qi00187j1.pdf [file d2qi00187j1.pdf]

## SUPPORTING INFORMATION

### **Symmetry-Breaking Phase Transitions, Dielectric and Magnetic properties of Pyrrolidinium-Tetrahalidocobaltates**

Martyna Książczyzna<sup>(a)</sup>, Vasyl Kinzhybalo<sup>(b)</sup>, Alina Bieńko<sup>(a)</sup>, Wojciech Medycki<sup>(c)</sup>, Ryszard Jakubas<sup>(a)</sup>,  
Cyril Rajnák<sup>(d)</sup>, Roman Boča<sup>(d)</sup>, Andrew Ozarowski<sup>e</sup>, Mykhaylo Ozerov<sup>e</sup>, Anna Piecha-Bisiorek<sup>(a)\*</sup>

<sup>(a)</sup> Faculty of Chemistry, University of Wrocław, F. Joliot-Curie 14, 50-383 Wrocław, Poland

<sup>(b)</sup> Institute of Low Temperature and Structure Research Polish Academy of Sciences, Okólna 2, 50-422  
Wrocław, Poland

<sup>(c)</sup> Institute of Molecular Physics, Polish Academy of Sciences, M. Smoluchowskiego 17, 60-179 Poznań,  
Poland

<sup>(d)</sup> Department of Chemistry, Faculty of Natural Sciences, University of SS Cyril and Methodius, 91701  
Trnava, Slovakia

<sup>(e)</sup> National High Magnetic Field Laboratory, Florida State University, 1800 East Paul Dirac Drive,  
Tallahassee, Florida 32310, United States

## 1. Experimental

**Table S1.** Element analysis of C, H and N for **PCC** and **PCB**.

| Elements                   | C (%) | H (%) | N (%) |
|----------------------------|-------|-------|-------|
| Calculation for <b>PCC</b> | 27.85 | 5.84  | 8.12  |
| Found for <b>PCC</b>       | 28.74 | 5.98  | 8.50  |
| Calculation for <b>PCB</b> | 18.38 | 3.86  | 5.36  |
| Found for <b>PCB</b>       | 18.75 | 3.86  | 5.47  |

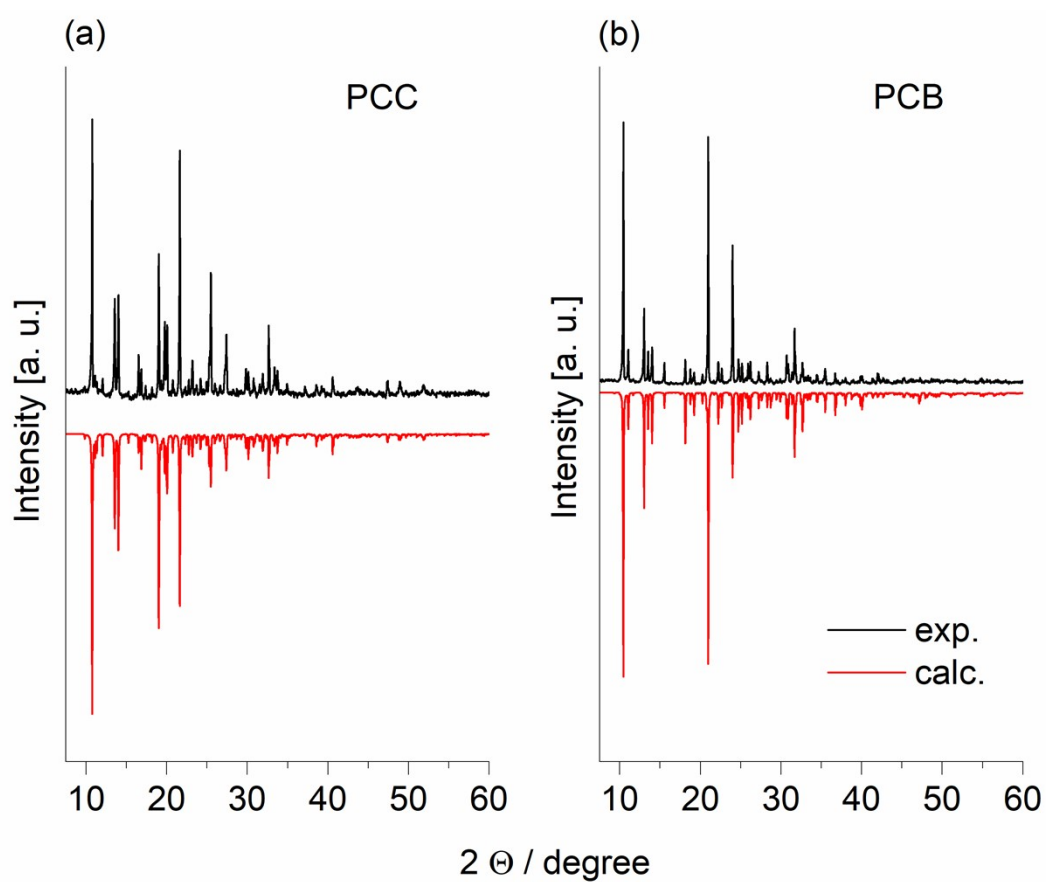

**Figure S1.** X-ray diffraction pattern at 298 K of (a) **PCC**; (b) **PCB**.

## 2. Thermal properties

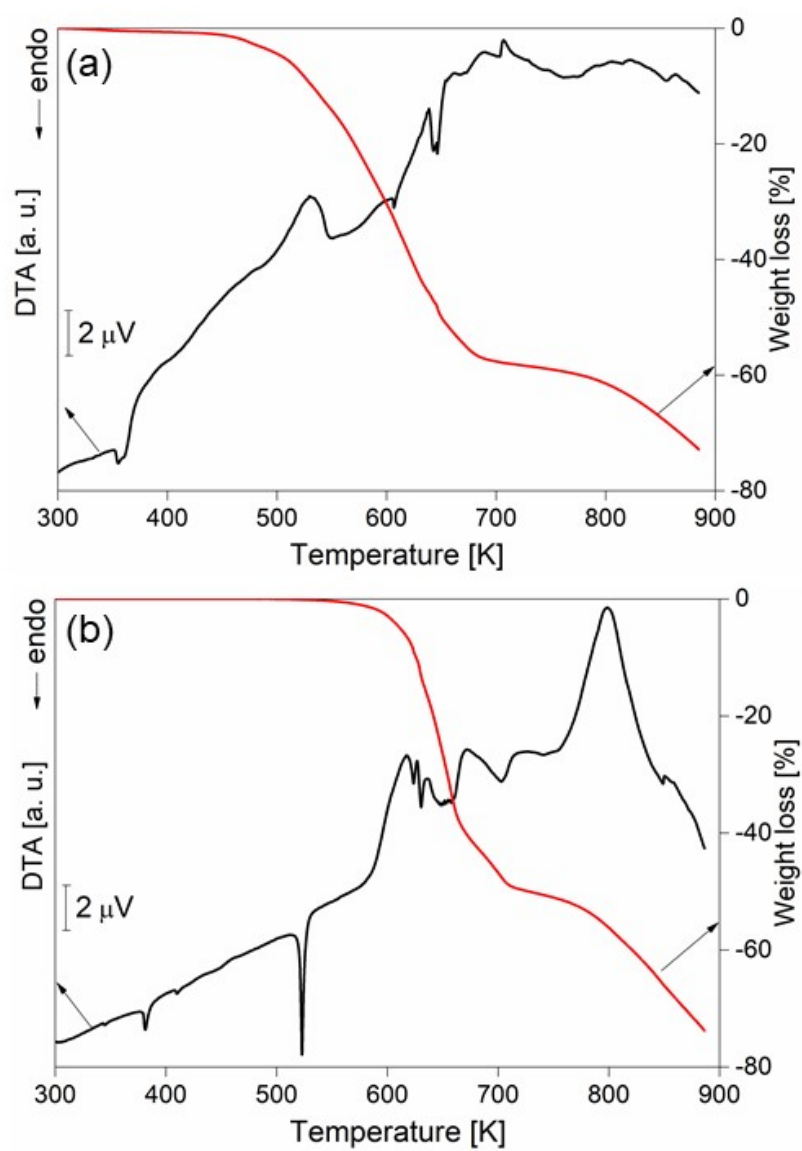

**Figure S2.** The results of the simultaneous TGA/DSC analyses for (a) **PCC** (sample mass  $m = 14.2541$  mg,  $2$  K $\cdot$ min $^{-1}$ ); (b) **PCB** (sample mass  $m = 13.7640$  mg,  $2$  K $\cdot$ min $^{-1}$ )

### 3. Crystal structure analysis

**Table S2.** Experimental data for PCC and PCB.

| <i>Crystal data</i>                                          |                                                                                                                                                                                                                                                                                                                                                                                                       |                         |                                                                 |                         |
|--------------------------------------------------------------|-------------------------------------------------------------------------------------------------------------------------------------------------------------------------------------------------------------------------------------------------------------------------------------------------------------------------------------------------------------------------------------------------------|-------------------------|-----------------------------------------------------------------|-------------------------|
| Empirical formula                                            | C <sub>8</sub> H <sub>20</sub> N <sub>2</sub> CoCl <sub>4</sub>                                                                                                                                                                                                                                                                                                                                       |                         | C <sub>8</sub> H <sub>20</sub> N <sub>2</sub> CoBr <sub>4</sub> |                         |
| Formula weight (g mol <sup>-1</sup> )                        | 344.99                                                                                                                                                                                                                                                                                                                                                                                                | 344.99                  | 522.83                                                          | 522.83                  |
| Crystal system                                               | Monoclinic                                                                                                                                                                                                                                                                                                                                                                                            | Orthorhombic            | Monoclinic                                                      | Orthorhombic            |
| Space group                                                  | <i>P2<sub>1</sub>/c</i>                                                                                                                                                                                                                                                                                                                                                                               | <i>Pna2<sub>1</sub></i> | <i>P2<sub>1</sub>/n</i>                                         | <i>Pna2<sub>1</sub></i> |
| Temperature (K)                                              | 290                                                                                                                                                                                                                                                                                                                                                                                                   | 350                     | 295                                                             | 400                     |
| Unit cell dimensions                                         |                                                                                                                                                                                                                                                                                                                                                                                                       |                         |                                                                 |                         |
| a (Å)                                                        | 32.874 (8)                                                                                                                                                                                                                                                                                                                                                                                            | 11.643 (5)              | 8.781 (3)                                                       | 11.999 (5)              |
| b (Å)                                                        | 8.885 (3)                                                                                                                                                                                                                                                                                                                                                                                             | 16.262 (1)              | 11.383 (4)                                                      | 16.686 (7)              |
| c (Å)                                                        | 21.428 (5)                                                                                                                                                                                                                                                                                                                                                                                            | 8.420 (1)               | 16.979 (5)                                                      | 8.728 (4)               |
| β (°)                                                        | 90.02 (3)                                                                                                                                                                                                                                                                                                                                                                                             | 90                      | 93.71 (3)                                                       | 90                      |
| V (Å <sup>3</sup> )                                          | 6259 (3)                                                                                                                                                                                                                                                                                                                                                                                              | 1594.2 (12)             | 1693.6 (10)                                                     | 1747.5 (13)             |
| Z                                                            | 16                                                                                                                                                                                                                                                                                                                                                                                                    | 4                       | 4                                                               | 4                       |
| D <sub>calc.</sub> (g cm <sup>-3</sup> )                     | 1.464                                                                                                                                                                                                                                                                                                                                                                                                 | 1.437                   | 2.050                                                           | 1.987                   |
| μ [mm <sup>-1</sup> ]                                        | 1.76                                                                                                                                                                                                                                                                                                                                                                                                  | 1.72                    | 10.43                                                           | 10.11                   |
| F(000)                                                       | 2832                                                                                                                                                                                                                                                                                                                                                                                                  | 708                     | 996                                                             | 996                     |
| Crystal size                                                 | 0.21×0.14×0.12                                                                                                                                                                                                                                                                                                                                                                                        | 0.49×0.16×0.13          | 0.29×0.19×0.13                                                  | 0.35×0.14×0.11          |
| <i>Data collection and Refinement</i>                        |                                                                                                                                                                                                                                                                                                                                                                                                       |                         |                                                                 |                         |
| Diffractometer                                               | Xcalibur with Atlas CCD camera                                                                                                                                                                                                                                                                                                                                                                        |                         |                                                                 |                         |
| Monochromator                                                | Graphite MoKα                                                                                                                                                                                                                                                                                                                                                                                         |                         |                                                                 |                         |
| Radiation type, wavelength<br>λ (Å)                          | MoKα, 0.71073                                                                                                                                                                                                                                                                                                                                                                                         | MoKα, 0.71073           | MoKα, 0.71073                                                   | MoKα, 0.71073           |
| Absorption correction                                        | Analytical<br><i>CrysAlis PRO</i> 1.171.38.34a (Rigaku Oxford Diffraction, 2015) Analytical numeric absorption correction using a multifaceted crystal model based on expressions derived by R.C. Clark & J.S. Reid. (Clark, R. C. & Reid, J. S. (1995). <i>Acta Cryst.</i> A51, 887-897) Empirical absorption correction using spherical harmonics, implemented in SCALE3 ABSPACK scaling algorithm. |                         |                                                                 |                         |
| Reflections<br>collected/independent/<br>observed [R(int)]   | 68870/155515/6666<br>0.059                                                                                                                                                                                                                                                                                                                                                                            | 7562/3537/824<br>0.036  | 11375/3971/1890<br>0.035                                        | 16707/4107/772<br>0.077 |
| Parameters                                                   | 542                                                                                                                                                                                                                                                                                                                                                                                                   | 136                     | 136                                                             | 136                     |
| Goodness-of-fit on F <sup>2</sup>                            | 0.97                                                                                                                                                                                                                                                                                                                                                                                                  | 0.95                    | 1.02                                                            | 0.81                    |
| R[F <sup>2</sup> > 2σ(F <sup>2</sup> )], wR(F <sup>2</sup> ) | 0.055, 0.142                                                                                                                                                                                                                                                                                                                                                                                          | 0.093, 0.426            | 0.056, 0.143                                                    | 0.081, 0.299            |
| Δρ <sub>max</sub> , Δρ <sub>min</sub> (e Å <sup>-3</sup> )   | 0.46, -0.40                                                                                                                                                                                                                                                                                                                                                                                           | 0.24, -0.36             | 1.01, -0.99                                                     | 0.31, -0.34             |
| CCDC                                                         | 2082868                                                                                                                                                                                                                                                                                                                                                                                               | 2082869                 | 2082870                                                         | 2082871                 |

Computer programs: *CrysAlis PRO* 1.171.38.34a (Rigaku OD, 2015), *CrysAlis PRO* 1.171.38.46 (Rigaku OD, 2015), *SHELXS* (Sheldrick, 2008), *ShelXT* (Sheldrick, 2015), *SHELXL* (Sheldrick, 2015), *Olex2* (Dolomanov *et al.*, 2009).

**Table S3.** Selected geometric parameters (Å, °) for PCC at 290 K.

|             |             |                |             |
|-------------|-------------|----------------|-------------|
| Co1—Cl1     | 2.250 (2)   | Co1B—Cl1B      | 2.255 (2)   |
| Co1—Cl2     | 2.2602 (19) | Co1B—Cl2B      | 2.2704 (19) |
| Co1—Cl3     | 2.2856 (18) | Co1B—Cl3B      | 2.2815 (19) |
| Co1—Cl4     | 2.2672 (19) | Co1B—Cl4B      | 2.2641 (19) |
| Co1A—Cl1A   | 2.248 (2)   | Co1C—Cl1C      | 2.2542 (19) |
| Co1A—Cl3A   | 2.2832 (18) | Co1C—Cl2C      | 2.2726 (19) |
| Co1A—Cl2A   | 2.254 (2)   | Co1C—Cl4C      | 2.2654 (19) |
| Co1A—Cl4A   | 2.2651 (19) | Co1C—Cl3C      | 2.2805 (19) |
| Cl1—Co1—Cl2 | 114.14 (8)  | Cl1B—Co1B—Cl2B | 107.56 (8)  |
| Cl1—Co1—Cl3 | 108.16 (8)  | Cl1B—Co1B—Cl3B | 109.04 (8)  |

|                |            |                |            |
|----------------|------------|----------------|------------|
| Cl1—Co1—Cl4    | 108.26 (8) | Cl1B—Co1B—Cl4B | 113.77 (8) |
| Cl2—Co1—Cl3    | 108.07 (8) | Cl2B—Co1B—Cl3B | 104.51 (7) |
| Cl2—Co1—Cl4    | 112.27 (8) | Cl4B—Co1B—Cl2B | 113.02 (9) |
| Cl4—Co1—Cl3    | 105.52 (8) | Cl4B—Co1B—Cl3B | 108.48 (8) |
| Cl1A—Co1A—Cl3A | 109.00 (8) | Cl1C—Co1C—Cl2C | 107.19 (7) |
| Cl1A—Co1A—Cl2A | 112.87 (8) | Cl1C—Co1C—Cl4C | 112.96 (8) |
| Cl1A—Co1A—Cl4A | 108.12 (8) | Cl1C—Co1C—Cl3C | 109.23 (8) |
| Cl2A—Co1A—Cl3A | 109.12 (8) | Cl2C—Co1C—Cl3C | 104.11 (7) |
| Cl2A—Co1A—Cl4A | 112.73 (9) | Cl4C—Co1C—Cl2C | 113.51 (8) |
| Cl4A—Co1A—Cl3A | 104.63 (7) | Cl4C—Co1C—Cl3C | 109.40 (8) |

**Table S4.** Hydrogen-bond geometry (Å, °) for PCC at 290 K.

| <i>D</i> —H... <i>A</i>        | <i>D</i> —H | H... <i>A</i> | <i>D</i> ... <i>A</i> | <i>D</i> —H... <i>A</i> |
|--------------------------------|-------------|---------------|-----------------------|-------------------------|
| N1—H1A...Cl1                   | 0.89        | 2.85          | 3.394 (5)             | 121                     |
| N1—H1A...Cl3                   | 0.89        | 2.53          | 3.309 (6)             | 146                     |
| N1—H1B...Cl2 <sup>i</sup>      | 0.89        | 2.41          | 3.247 (6)             | 158                     |
| N6—H6A...Cl2                   | 0.89        | 2.32          | 3.195 (7)             | 168                     |
| N6—H6B...Cl2C <sup>ii</sup>    | 0.89        | 2.84          | 3.571 (8)             | 141                     |
| N6—H6B...Cl3C <sup>ii</sup>    | 0.89        | 2.65          | 3.352 (6)             | 137                     |
| N1A—H1AA...Cl1A                | 0.89        | 2.83          | 3.342 (6)             | 118                     |
| N1A—H1AA...Cl3A                | 0.89        | 2.48          | 3.275 (7)             | 148                     |
| N1A—H1AB...Cl4A <sup>iii</sup> | 0.89        | 2.48          | 3.293 (7)             | 152                     |
| C4A—H4AB...Cl2C <sup>iv</sup>  | 0.97        | 2.83          | 3.655 (11)            | 143                     |
| N6A—H6AA...Cl3A <sup>iv</sup>  | 0.89        | 2.59          | 3.315 (6)             | 139                     |
| N6A—H6AB...Cl2A                | 0.89        | 2.29          | 3.175 (8)             | 173                     |
| N1B—H1BA...Cl1B                | 0.89        | 2.82          | 3.365 (5)             | 121                     |
| N1B—H1BA...Cl3B                | 0.89        | 2.56          | 3.314 (7)             | 144                     |
| N1B—H1BB...Cl2B <sup>v</sup>   | 0.89        | 2.42          | 3.263 (6)             | 158                     |
| N6B—H6BA...Cl2B <sup>vi</sup>  | 0.89        | 2.86          | 3.593 (8)             | 141                     |
| N6B—H6BA...Cl3B <sup>vi</sup>  | 0.89        | 2.66          | 3.377 (7)             | 138                     |
| N6B—H6BB...Cl4B                | 0.89        | 2.33          | 3.197 (8)             | 165                     |
| C10B—H10F...Cl3B               | 0.97        | 2.92          | 3.795 (11)            | 150                     |
| N1C—H1CA...Cl1C                | 0.89        | 2.83          | 3.369 (5)             | 121                     |
| N1C—H1CA...Cl3C                | 0.89        | 2.53          | 3.306 (7)             | 146                     |
| N1C—H1CB...Cl4 <sup>vii</sup>  | 0.89        | 2.47          | 3.285 (7)             | 152                     |
| C4C—H4CB...Cl2B                | 0.97        | 2.72          | 3.597 (11)            | 151                     |
| N6C—H6CA...Cl4C                | 0.89        | 2.30          | 3.165 (7)             | 164                     |
| N6C—H6CB...Cl3 <sup>viii</sup> | 0.89        | 2.47          | 3.280 (6)             | 152                     |

Symmetry codes: (i)  $x, y-1, z$ ; (ii)  $x, -y+3/2, z+1/2$ ; (iii)  $-x+1, -y+2, -z+1$ ; (iv)  $-x+1, y-1/2, -z+1/2$ ; (v)  $-x+2, -y+1, -z$ ; (vi)  $-x+2, y-1/2, -z+1/2$ ; (vii)  $x, y+1, z$ ; (viii)  $x, -y+1/2, z-1/2$ .

**Table S5.** Selected geometric parameters (Å, °) for PCC at 350 K.

|             |           |             |            |
|-------------|-----------|-------------|------------|
| Co1—Cl3     | 2.240 (6) | Co1—Cl2     | 2.194 (18) |
| Co1—Cl1     | 2.255 (6) | Co1—Cl4     | 2.287 (16) |
| Cl3—Co1—Cl1 | 108.6 (3) | Cl2—Co1—Cl3 | 106.6 (8)  |
| Cl3—Co1—Cl4 | 111.5 (9) | Cl2—Co1—Cl1 | 112.7 (6)  |
| Cl1—Co1—Cl4 | 105.2 (6) | Cl2—Co1—Cl4 | 112.1 (5)  |

**Table S6.** Hydrogen-bond geometry (Å, °) for **PCC** at 350 K.

| <i>D</i> — <i>H</i> ··· <i>A</i>       | <i>D</i> — <i>H</i> | <i>H</i> ··· <i>A</i> | <i>D</i> ··· <i>A</i> | <i>D</i> — <i>H</i> ··· <i>A</i> |
|----------------------------------------|---------------------|-----------------------|-----------------------|----------------------------------|
| N1—H1 <i>B</i> ···C11                  | 0.89                | 2.78                  | 3.43 (3)              | 131                              |
| C2—H2 <i>A</i> ···C14 <sup>i</sup>     | 0.97                | 2.79                  | 3.57 (4)              | 137                              |
| C9—H9 <i>B</i> ···C13 <sup>ii</sup>    | 0.97                | 2.74                  | 3.60 (6)              | 149                              |
| C10—H10 <i>A</i> ···C14 <sup>iii</sup> | 0.97                | 2.74                  | 3.66 (6)              | 158                              |
| N6—H6 <i>B</i> ···C12                  | 0.89                | 2.70                  | 3.44 (4)              | 141                              |

Symmetry codes: (i)  $-x+1, -y+1, z-1/2$ ; (ii)  $-x, -y+1, z+1/2$ ; (iii)  $-x, -y+1, z-1/2$ .**Table S7.** Selected geometric parameters (Å, °) for **PCB** at 295 K.

|             |             |             |             |
|-------------|-------------|-------------|-------------|
| Br1—Co1     | 2.3921 (16) | Co1—Br2     | 2.4001 (15) |
| Br4—Co1     | 2.3867 (15) | Co1—Br3     | 2.3963 (16) |
| Br1—Co1—Br2 | 109.00 (5)  | Br4—Co1—Br2 | 109.95 (6)  |
| Br1—Co1—Br3 | 110.99 (6)  | Br4—Co1—Br3 | 109.10 (6)  |
| Br4—Co1—Br1 | 111.79 (5)  | Br3—Co1—Br2 | 105.84 (6)  |

**Table S8.** Hydrogen-bond geometry (Å, °) for **PCB** at 295 K.

| <i>D</i> — <i>H</i> ··· <i>A</i>      | <i>D</i> — <i>H</i> | <i>H</i> ··· <i>A</i> | <i>D</i> ··· <i>A</i> | <i>D</i> — <i>H</i> ··· <i>A</i> |
|---------------------------------------|---------------------|-----------------------|-----------------------|----------------------------------|
| N1—H1 <i>A</i> ···Br2 <sup>i</sup>    | 0.89                | 2.72                  | 3.538 (8)             | 153                              |
| N1—H1 <i>B</i> ···Br1                 | 0.89                | 2.82                  | 3.423 (6)             | 127                              |
| N1—H1 <i>B</i> ···Br3                 | 0.89                | 2.93                  | 3.672 (8)             | 142                              |
| N6—H6 <i>A</i> ···Br3 <sup>ii</sup>   | 0.89                | 2.76                  | 3.583 (11)            | 154                              |
| N6—H6 <i>B</i> ···Br4                 | 0.89                | 2.80                  | 3.510 (11)            | 138                              |
| C10—H10 <i>A</i> ···Br2 <sup>ii</sup> | 0.97                | 2.79                  | 3.700 (14)            | 157                              |
| C10—H10 <i>B</i> ···Br4               | 0.97                | 2.95                  | 3.663 (18)            | 131                              |
| C9—H9 <i>A</i> ···Br3 <sup>iii</sup>  | 0.97                | 2.99                  | 3.950 (18)            | 173                              |
| C9—H9 <i>B</i> ···Br1 <sup>iv</sup>   | 0.97                | 3.09                  | 3.89 (2)              | 141                              |

Symmetry codes: (i)  $-x, -y+1, -z+1$ ; (ii)  $-x, -y, -z+1$ ; (iii)  $-x+1, -y, -z+1$ ; (iv)  $x, y-1, z$ .**Table S9.** Selected geometric parameters (Å, °) for **PCB** at 400 K.

|             |             |             |            |
|-------------|-------------|-------------|------------|
| Co1—Br1     | 2.374 (4)   | Co1—Br2     | 2.384 (12) |
| Co1—Br3     | 2.386 (4)   | Co1—Br4     | 2.334 (12) |
| Br1—Co1—Br3 | 110.60 (16) | Br4—Co1—Br1 | 110.1 (4)  |
| Br1—Co1—Br2 | 109.1 (4)   | Br4—Co1—Br3 | 110.2 (4)  |
| Br2—Co1—Br3 | 105.6 (4)   | Br4—Co1—Br2 | 111.1 (2)  |

**Table S10.** Hydrogen-bond geometry (Å, °) for **PCB** at 400 K.

| <i>D</i> — <i>H</i> ··· <i>A</i>    | <i>D</i> — <i>H</i> | <i>H</i> ··· <i>A</i> | <i>D</i> ··· <i>A</i> | <i>D</i> — <i>H</i> ··· <i>A</i> |
|-------------------------------------|---------------------|-----------------------|-----------------------|----------------------------------|
| N1—H1 <i>B</i> ···Br1               | 0.89                | 3.08                  | 3.69 (4)              | 128                              |
| C2—H2 <i>A</i> ···Br4 <sup>i</sup>  | 0.97                | 3.05                  | 3.72 (5)              | 127                              |
| N6—H6 <i>B</i> ···Br2               | 0.89                | 2.80                  | 3.52 (3)              | 139                              |
| C9—H9 <i>B</i> ···Br3 <sup>ii</sup> | 0.97                | 3.25                  | 3.95 (9)              | 131                              |

Symmetry codes: (i)  $-x+1, -y+1, z-1/2$ ; (ii)  $-x, -y+1, z+1/2$ .

#### 4. Optical properties

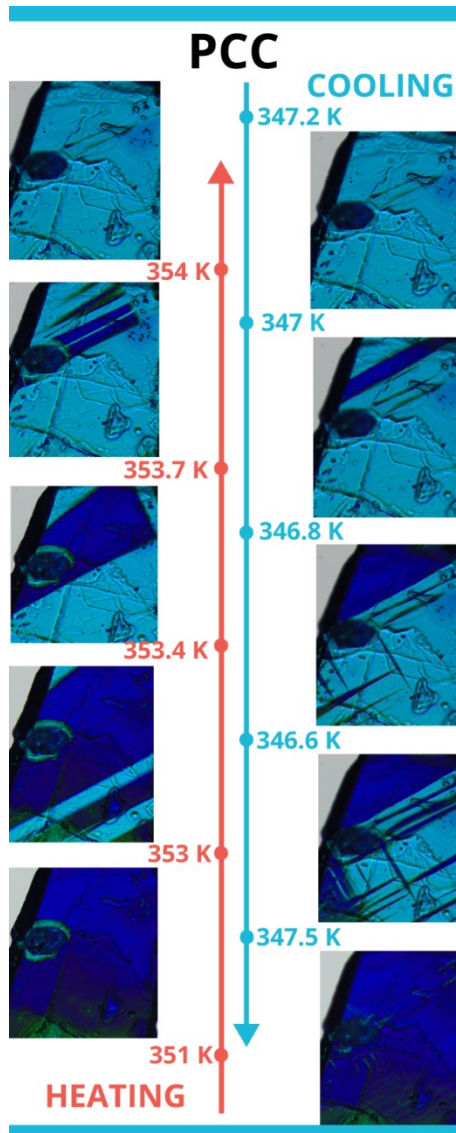

**Figure S13.** Evolution of domain structure of **PCC**. The figure contains an approximate temperatures.

Between RT and 353 K the **PCC** sample is monodomain, then at approx. 353.4 K the domain walls appear. In Phase I (above 354 K), the sample becomes mono-domain. This means that the Phase I can be considered as prototypical/paraelastic one. During the cooling process, below 347 the evolution of the phase front and appearing of the ferroelastic domain structure is well visible. The appearance of the domain structure only in the close vicinity of PT (I→II) proves that strong distortion of the crystal lattice initiates the formation of domains. Below 347.5 K the ferroelastic domains disappeared in spite of the fact that over the all Phase (II) the compound is ferroelastic.

## 5. Proton Magnetic Resonance (second moment ( $M_2$ )).

The temperature dependence of the second moment of the proton resonance lines,  $M_2$ , of **PCB** and **PCC** are shown in Figure S3. For **PCB** the second moment values decrease from about 41  $G^2$  at 107K to below 3  $G^2$  at 385 K. Also for **PCC** is observed the narrowing of  $^1H$  NMR line from about 54  $G^2$  at 107 K to plateau below 4  $G^2$  at 380 K. These both high values of the second moment at the lowest temperatures confirms the influence of the present of the paramagnetic  $^{59}Co(II)$  in crystal structure of both studied compounds. This fact denotes not only the presence of the  $^1H$ - $^{59}Co$  interaction next to the  $^1H$ - $^1H$  interaction<sup>1</sup> but the strongly quadrupolar nature additionally disturb the  $^1H$ - $^{59}Co$  couplings increasing the width of measured NMR line.<sup>2</sup>

**Table S11** Activation energies, correlation times and motional constants evaluated for **PCB** and **PCC**.

| Compound                 | <b>PCB</b>            | <b>PCC</b>            |
|--------------------------|-----------------------|-----------------------|
| $E_{a1}$ [kJ/mol]        | 4.45                  | 4.45                  |
| $\tau_{01}$ [s]          | $3.75 \cdot 10^{-10}$ | $3.75 \cdot 10^{-10}$ |
| $K_1$ [Hz <sup>2</sup> ] | $1.75 \cdot 10^{11}$  | $4.76 \cdot 10^{11}$  |
| $E_{a2}$ [kJ/mol]        | 3.35                  | 3.35                  |
| $\tau_{02}$ [s]          | $3.8 \cdot 10^{-11}$  | $3.8 \cdot 10^{-11}$  |
| $K_2$ [Hz <sup>2</sup> ] | $1.26 \cdot 10^{12}$  | $1.26 \cdot 10^{12}$  |

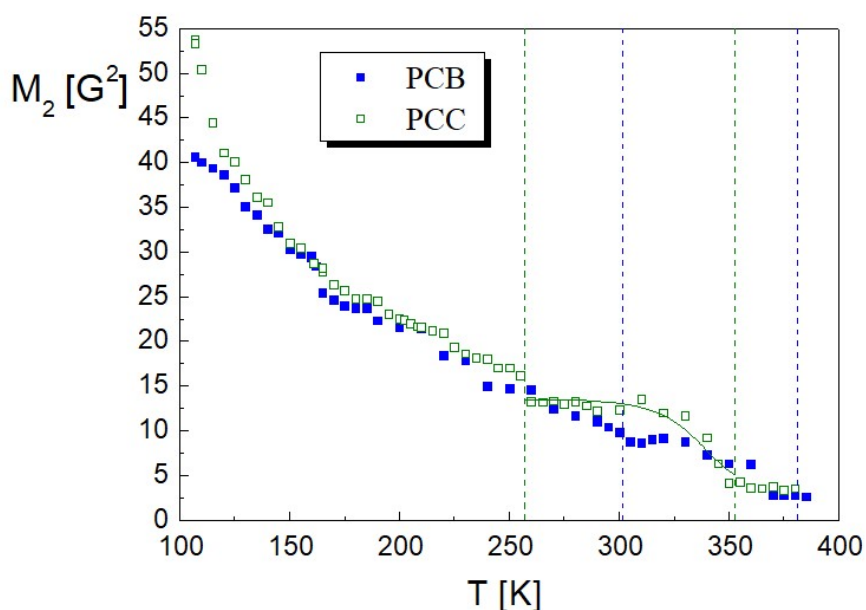

**Figure S12.** Temperature dependence of  $^1H$  NMR second moment of **PCB** and **PCC**.



The calculations of  $M_2$  based on the crystal structures of compounds containing the pyrrolidinium cations gave the values *ca.* 18-20  $G^2$  in the rigid state. In Figure S3 the second moment drops to such values only above 200 K where the domination of quadrupolar interaction gradually vanishes. At PT temperatures there are visible a distinct change in slopes or sudden drop of the  $M_2$  values. In the case of **PCC** around 257 PT **PCC** a of small drop *ca.* 3  $G^2$  is visible. In turn above 353 K the plateau begins without any drop in  $M_2$  values. It is the opposite for **PCB**. In case of **PCC** the reduction of  $M_2$  from 13  $G^2$  to 4  $G^2$  in temperature range 257 K – 353 K has been fitted with standard BBP formula and the calculated theoretical solid line is drawn in Figure S12. For the chosen reduction of second moment the found activation energy is to be 54.9  $\text{kJ}\cdot\text{mol}^{-1}$  with the correlation time of  $4.36 \cdot 10^{-14}$  s. Considering the result of this numerically analyzed reduction of the second moment of  $^1\text{H}$  NMR line it may be concluded that the pyrrolidinium cation in this temperature range is probably performing packing motion of the pyrrolidinium cation between the twisted and envelope conformations or rotations about the pseudo-C5 axis. At the highest temperatures (above 350-360 K) the isotropic rotations and cationic self-diffusion are expected taking into account the previous results for compounds containing in the structure pyrrolidinium.<sup>3-6</sup>

#### References:

- 1 A. Abragam, *The Principles of Nuclear Magnetism*. Oxford University Press, Oxford, 1961.
- 2 J. D. Epperson, Li-June Ming, B. D. Woosley, G. R. Baker, and G. R. Newkome, *Inorg. Chem.*, 1999, **38**, 4498-4502.
- 3 C. P. Slichter, *Principles of Magnetic Resonance*, Springer Ser. Solid-State Sci., Berlin, 1990.
- 4 D. Kruk, *Theory of Evolution and Relaxation of Multi-Spin Systems: Application to Nuclear Magnetic Resonance (NMR) and Electron Spin Resonance (ESR)*, Arima Publishing, UK, 2007.
- 5 J. Kowalewski, D. Kruk and G. Parigi, *Adv. Inorg. Chem.*, 2005, **57**, 41-104.
- 6 D. Kruk and J. Kowalewski, *Mol. Phys.*, 2003, **101**, 2861-2874.

## 6. HF EPR spectroscopy

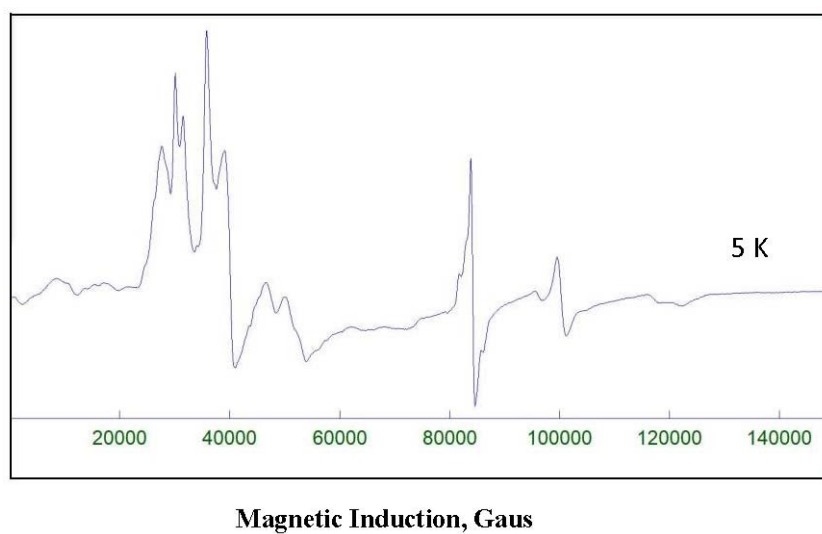

Figure S14. High-field EPR spectra of PCC recorded at 5 K.

## 7. Magnetic properties

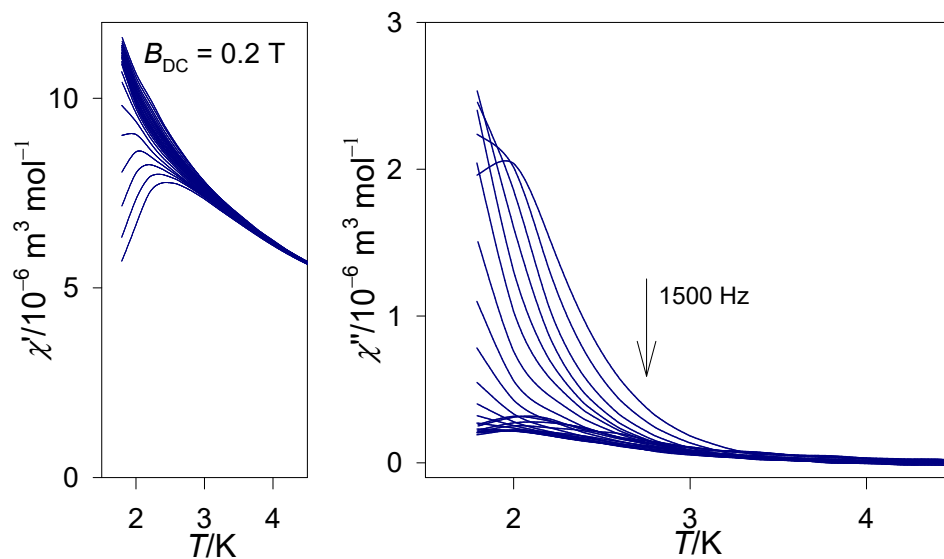

Figure S15. Temperature evolution of the AC susceptibility components for PCC at  $B_{DC} = 0.2$  T.

**Table S12.** Temperature dependence of AC susceptibility parameters for PCC at  $B_{DC} = 0.2$  T <sup>a</sup>

| $T/K$ | $R(\chi')$<br>/% | $R(\chi'')$<br>/% | $\chi_s$ | $\chi_{LF}$ | $\alpha_{LF}$ | $\tau_{LF}$<br>/ s | $\chi_{HF}$ | $\alpha_{HF}$ | $\tau_{HF}$<br>/ $10^{-6}$ s | $x_{LF}$ | $x_{HF}$ |
|-------|------------------|-------------------|----------|-------------|---------------|--------------------|-------------|---------------|------------------------------|----------|----------|
| 1.8   | 0.51             | 3.2               | 4.37(8)  | 5.6(9)      | .49(17)       | 3.4                | 12.4(8)     | .17(1)        | 342(7)                       | .16      | .84      |
| 2.0   | 0.16             | 1.5               | 3.94(8)  | 5.5(3)      | .54(4)        | 2.3                | 11.5(2)     | .24(1)        | 129(3)                       | .21      | .79      |
| 2.2   | 0.36             | 3.6               | 3.9(5)   | 5.6(9)      | .60(8)        | 2.4                | 10.9(5)     | .30(3)        | 50(9)                        | .25      | .75      |
| 2.4   | 0.39             | 6.7               | 4.5(11)  | 5.9(16)     | .60(12)       | 2.2                | 10.1(5)     | .35(6)        | 25(15)                       | .26      | .74      |
| 2.6   | 0.31             | 9.1               | 4.8(23)  | 5.9(28)     | .60(15)       | 3.7                | 9.5(6)      | .44(10)       | 10                           | .26      | .74      |
| 2.8   | 0.23             | 9.9               | 4.8      | 5.7         | .60           | 2.5                | 8.7(4)      | .49(15)       | 3.2                          | .22      | .78      |

<sup>a</sup>  $\chi_s$  – adiabatic susceptibility,  $\chi_i$  – isothermal susceptibility,  $\alpha_i$  – distribution parameter,  $\tau_i$  – relaxation time,  $x_i$  – mole fraction for the  $i$ -th relaxation channel (LF or HF);  $R(\chi')$  and  $R(\chi'')$  – discrepancy factors of the fit. Standard deviations of the varied parameters in parentheses.
